# Supplementary material
Source: Springer Nature journal article supplement (https://www.springermedizin.de/resource/supplementary/12913_2007_477_MOESM2_ESM.pdf/9534832)
Supplement: MOESM2 [file 9534832]

## ***Preclinical Phase***

Review and search of the literature

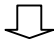

## ***Phase 1 (Modeling)***

Combining theory with qualitative work

(2 focus groups with patients)

(2 focus groups with practice staff)

Interviews with experts in the areas of health psychology and volunteering

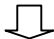

## ***Phase 2 (Exploratory trial)***

Preliminary intervention in 2 practices

(24 patients and 4 peer supporters recruited)

Qualitative work

(1 focus group with peer supporters)

(2 focus groups with patients)

(3 semi structured interviews with practice staff)

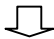

**DEFINITIVE INTERVENTION**
